# Supplementary material for: How steady are steady-state mountain belts? A reexamination of the Olympic Mountains (Washington state, USA)
Source: Copernicus journal article supplement (doi:10.5194/esurf-7-275-2019), 2019-03-14
Supplement: Supplementary file 1 [file esurf-7-275-2019-supplement.zip]

Archive with 6 entries (6 files):
- table_S4_ZFT_single.docx
- esurf-7-275-2019-supplement-title-page.pdf
- table_S2_zircons_He.xlsx
- table_S1_apatites_He.xlsx
- esurf-2018-65_supplement.pdf
- table_S3_AFT_single.docx
