# Supplementary material for: How steady are steady-state mountain belts? A reexamination of the Olympic Mountains (Washington state, USA)
Source: Copernicus journal article supplement (doi:10.5194/esurf-7-275-2019), 2019-03-14
Supplement: Supplementary file 1 [file esurf-7-275-2019-supplement.zip › esurf-7-275-2019-supplement-title-page.pdf]

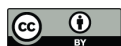

## *Supplement of*

# **How steady are steady-state mountain belts? A reexamination of the Olympic Mountains (Washington state, USA)**

**Lorenz Michel et al.**

*Correspondence to:* Todd A. Ehlers ([todd.ehlers@uni-tuebingen.de](mailto:todd.ehlers@uni-tuebingen.de))

- [esurf-7-275-2019-supplement-title-page.pdf](#)
- [esurf-2018-65\\_supplement.pdf](#)
- [table\\_S1\\_apatites\\_He.xlsx](#)
- [table\\_S2\\_zircons\\_He.xlsx](#)
- [table\\_S3\\_AFT\\_single.docx](#)
- [table\\_S4\\_ZFT\\_single.docx](#)

The copyright of individual parts of the supplement might differ from the CC BY 4.0 License.
